# Supplementary material for: Investigation of Uncertainties in Multi-variable Bias Adjustment in Multi-model Ensemble
Source: Copernicus journal article supplement (doi:10.5194/piahs-386-55-2024), 2024-04-19
Supplement: Supplementary file 1 [file piahs-386-55-2024-supplement.pdf]

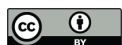

*Supplement of*

## **Investigation of Uncertainties in Multi-variable Bias Adjustment in Multi-model Ensemble**

**Saurabh Kelkar and Koji Dairaku**

*Correspondence to:* Saurabh Kelkar (kelkarsaurabh527@gmail.com)

The copyright of individual parts of the supplement might differ from the article licence.

## T2 for July without Bias Adjustment

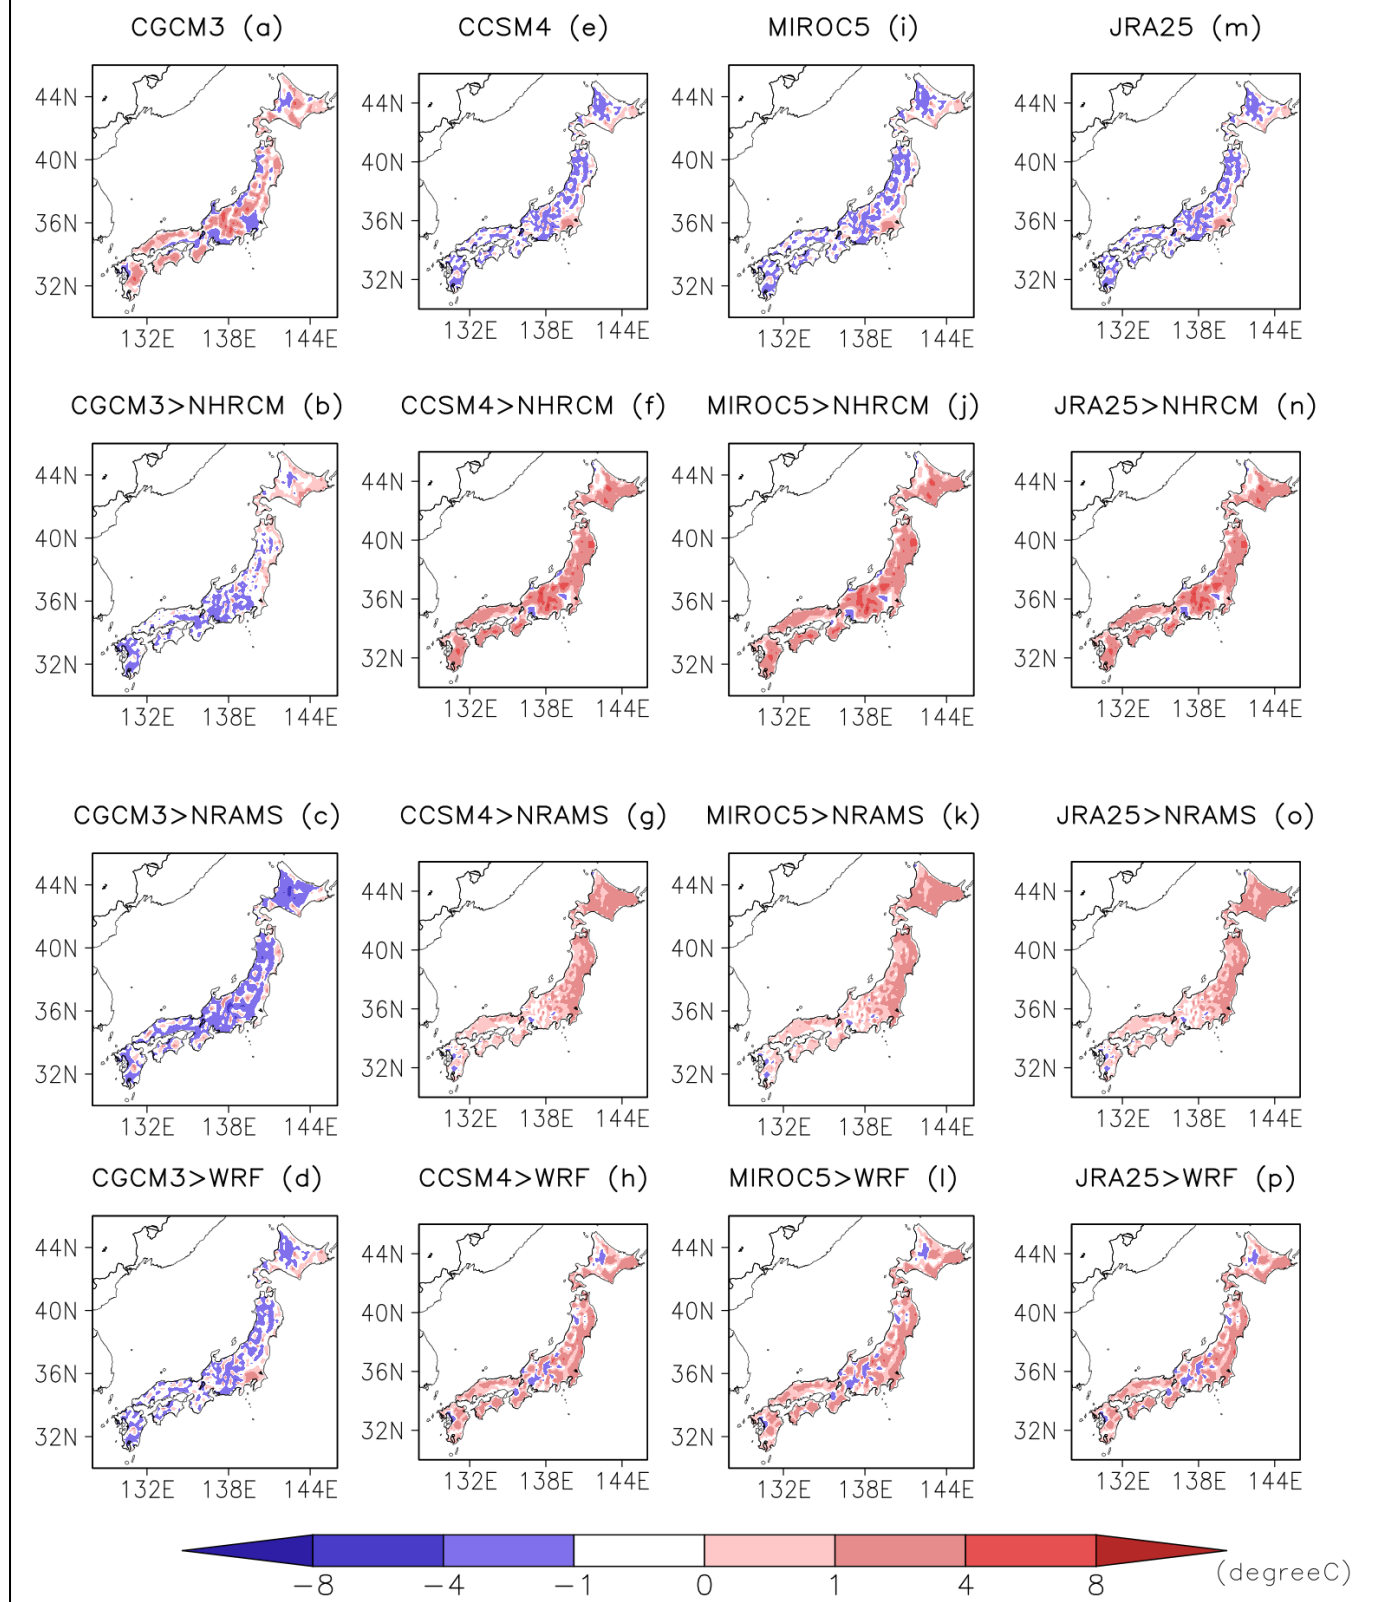

**Figure S1: Bias in surface air temperature (T2) before the bias adjustment for GCMs, JRA25 (Top row), and corresponding RCMs.**

## T2 for July with Bias Adjustment

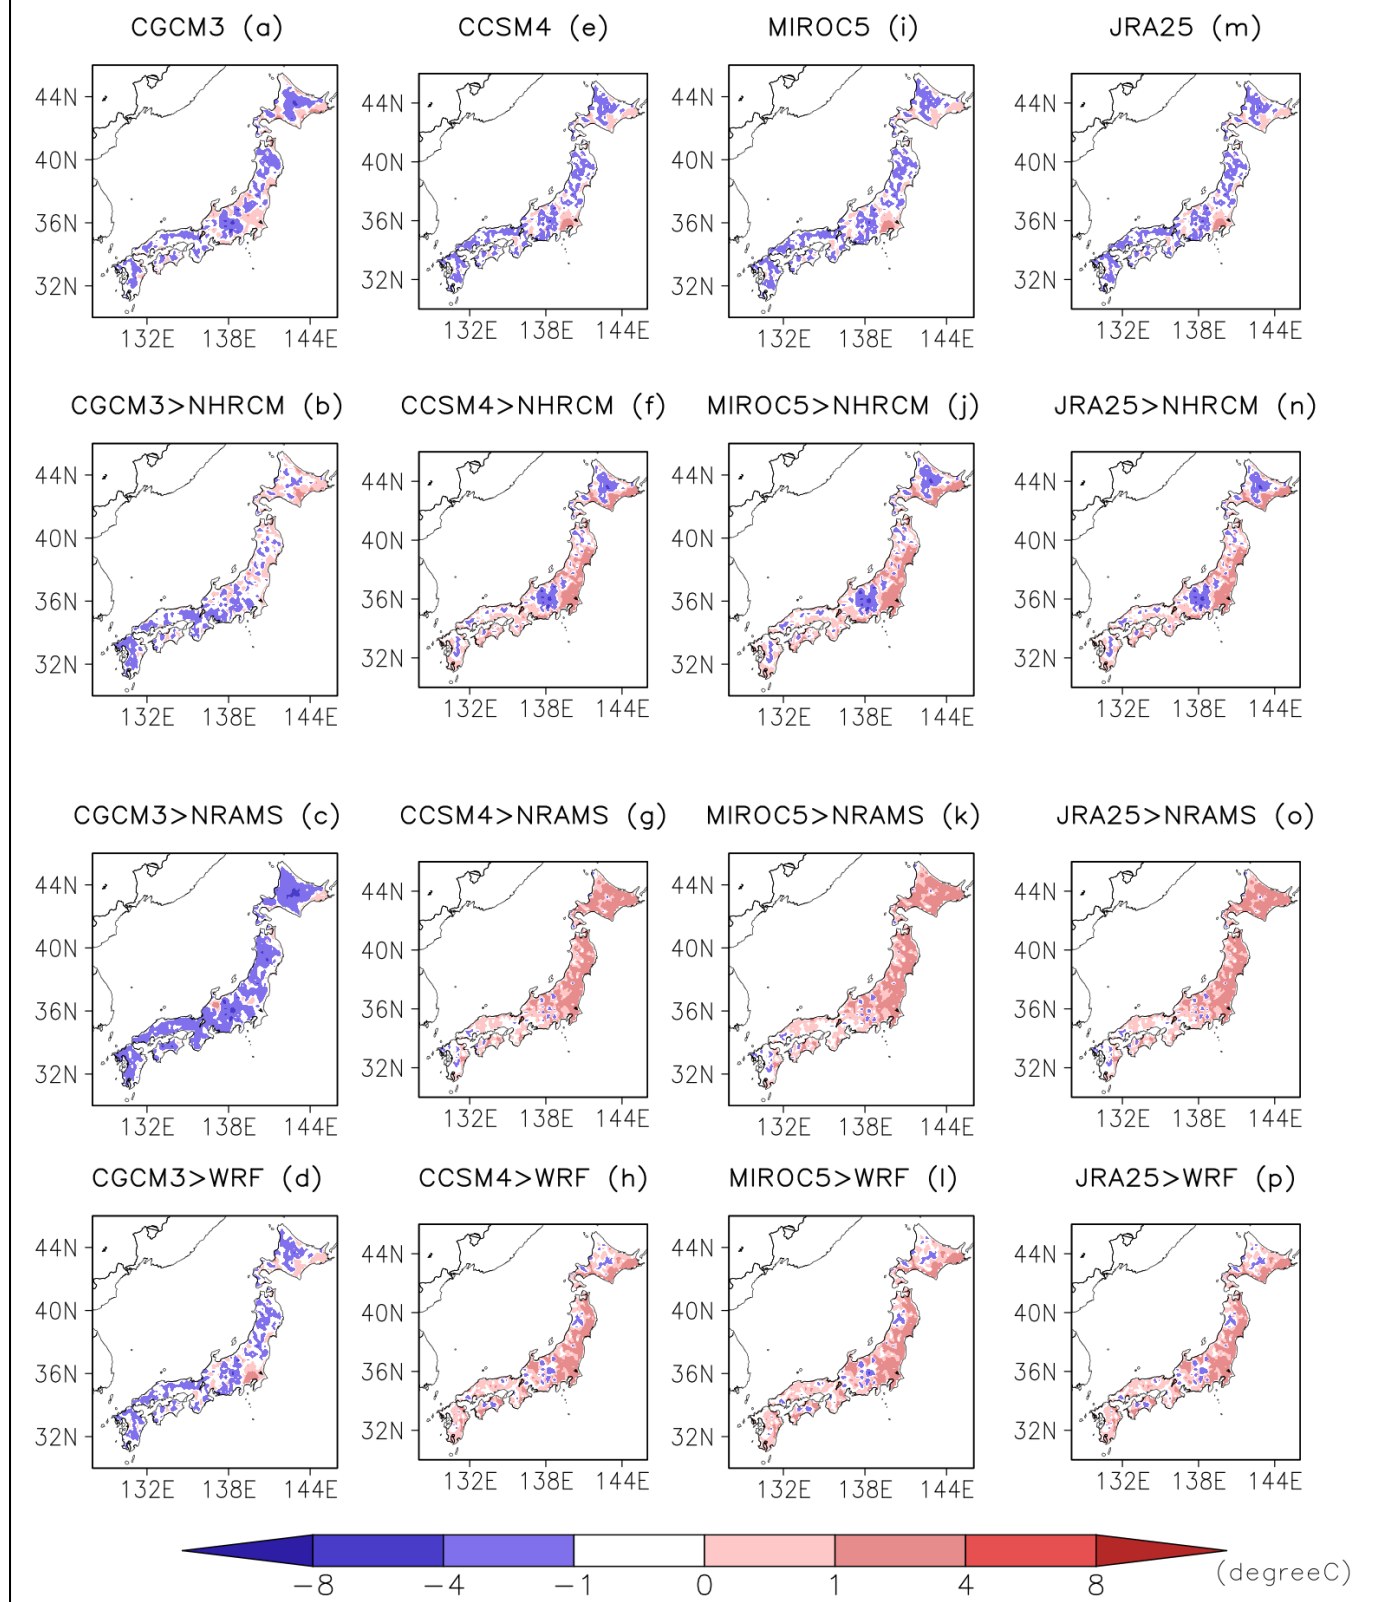

**Figure S2: Bias in surface air temperature (T2) after the bias adjustment for GCMs, JRA25 (Top row), and corresponding RCMs.**

# Difference in T2 Bias for July

$$\text{Difference} = |\text{T2 before adjustment}| - |\text{T2 after adjustment}|$$

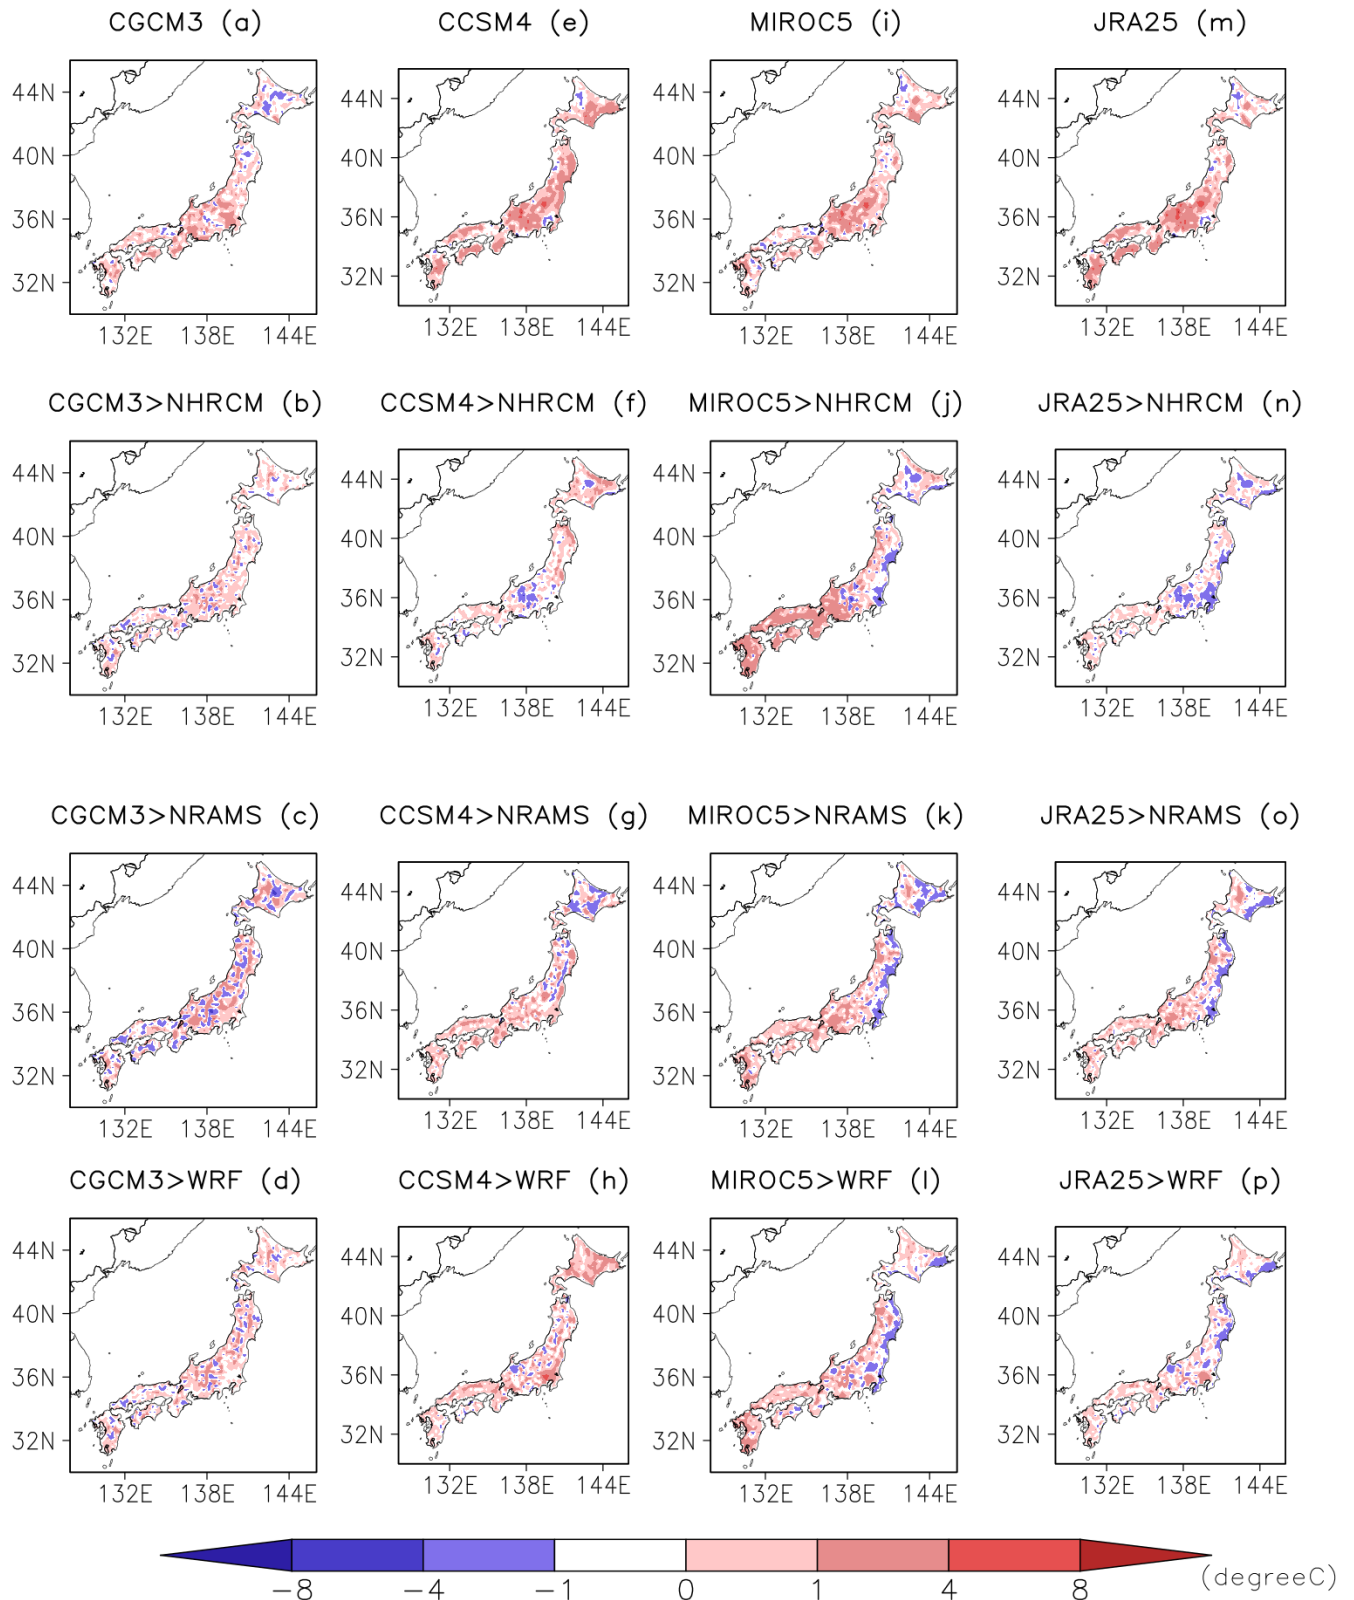

**Figure S3: Absolute difference between bias before and after the adjustment for surface air temperature (T2) GCMs, JRA25 (Top row), and corresponding RCMs.**

# Bias RH before Bias Adjustment for July

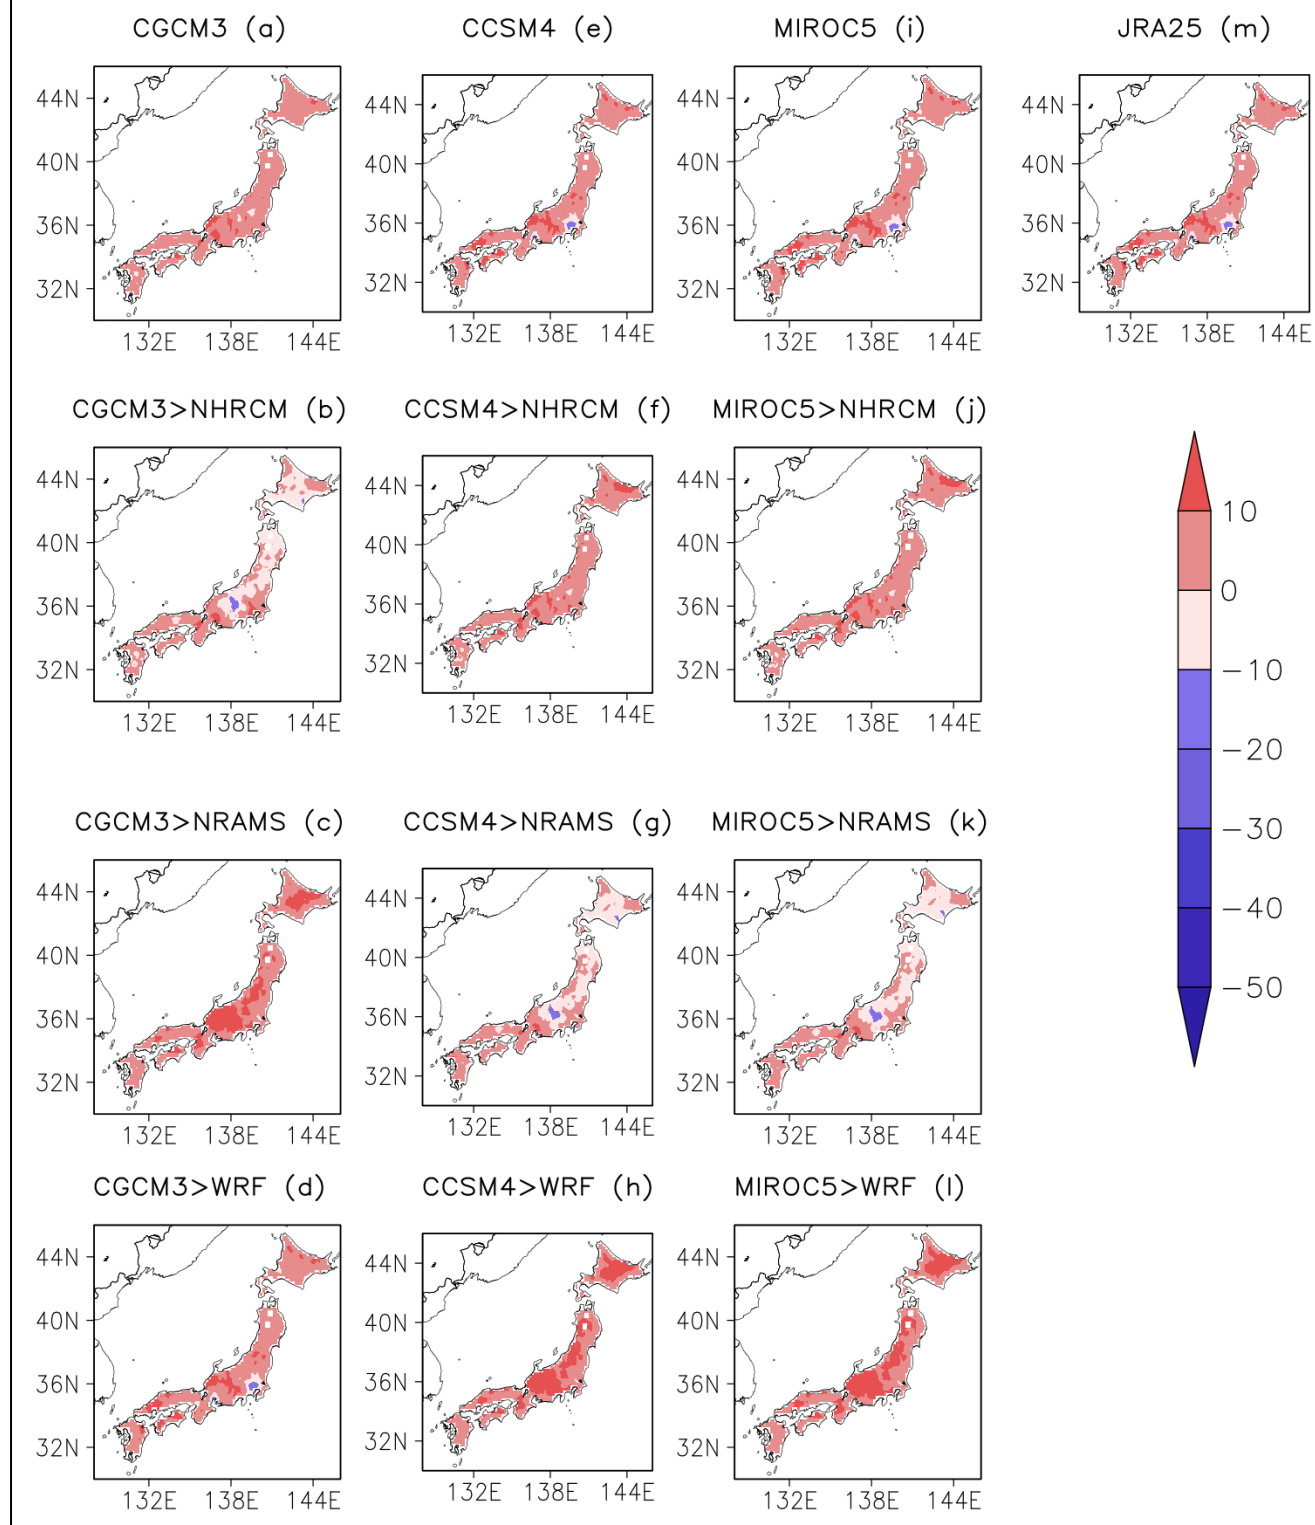

**Figure S4: Bias in relative humidity (RH) before the bias adjustment for GCMs, JRA25 (Top row), and corresponding RCMs.**

# Bias RH after Bias Adjustment for July

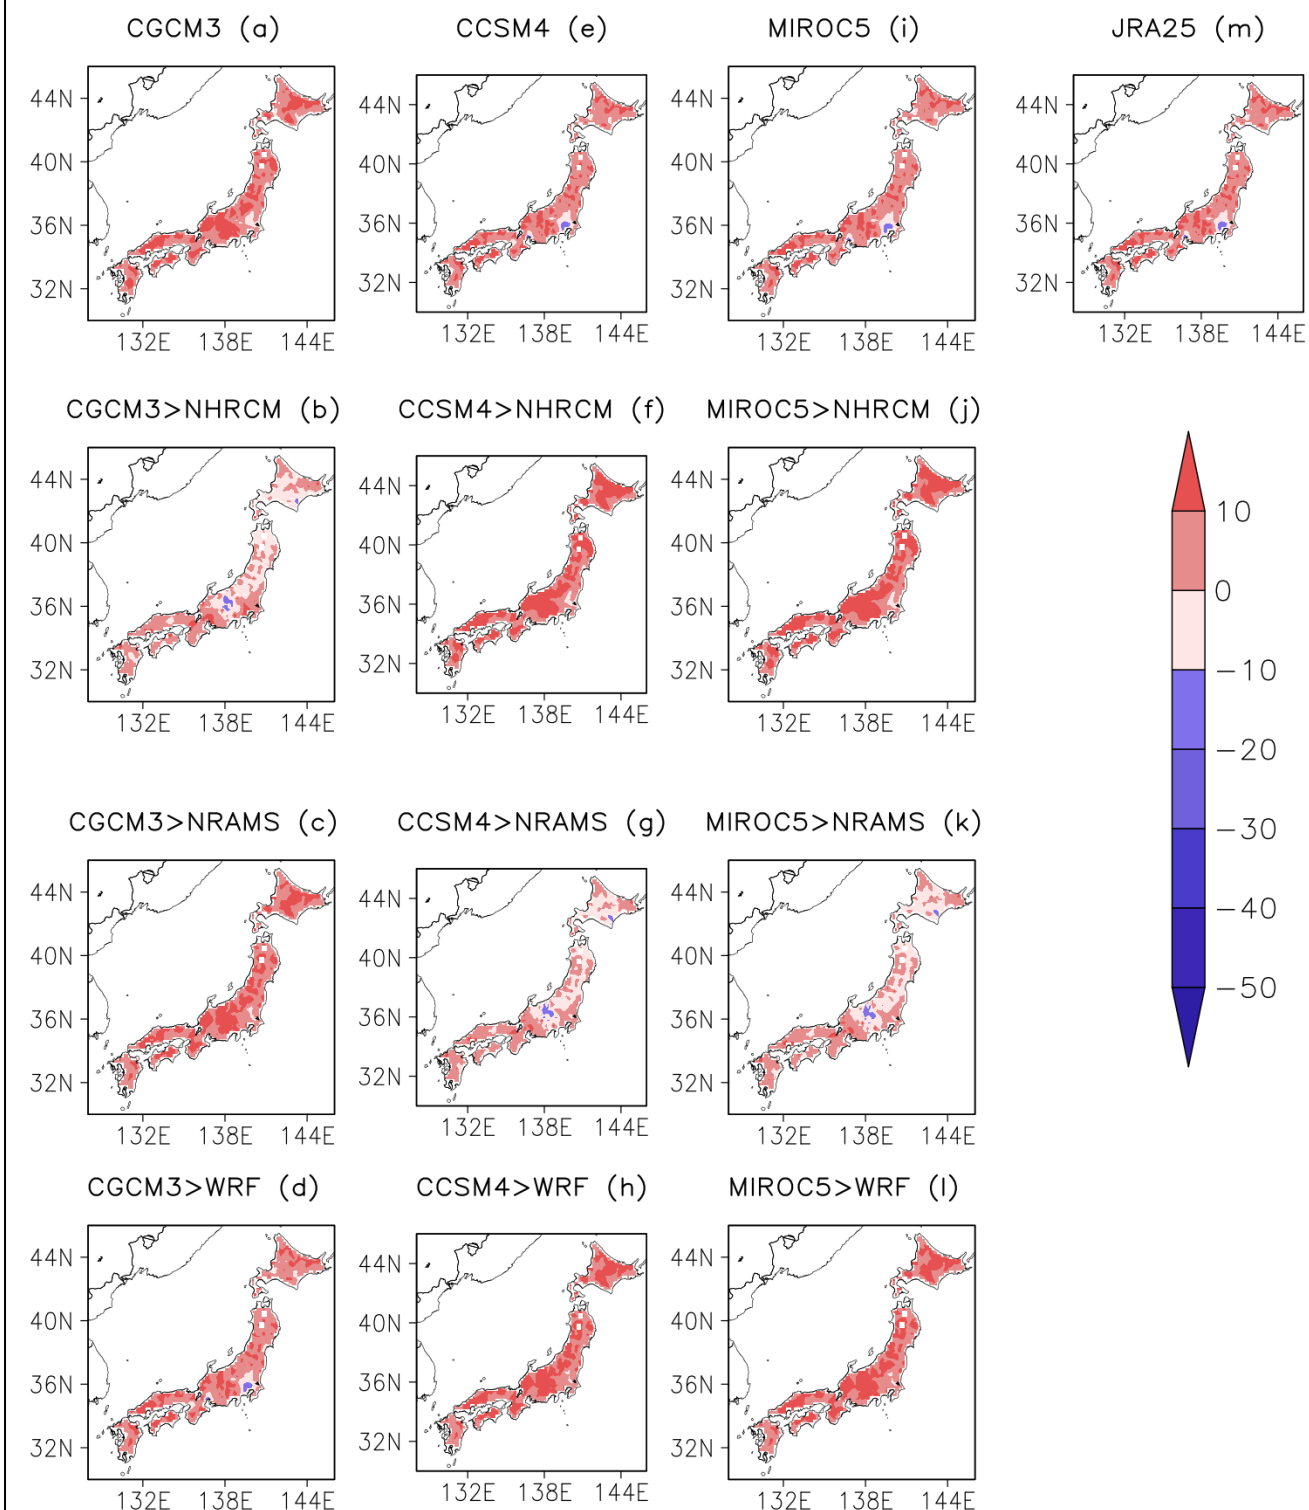

**Figure S5: Bias in relative humidity (RH) after the bias adjustment for GCMs, JRA25 (Top row), and corresponding RCMs.**



# Difference in RH Bias for July

$$\text{Difference} = |\text{RH before adjustment}| - |\text{RH after adjustment}|$$

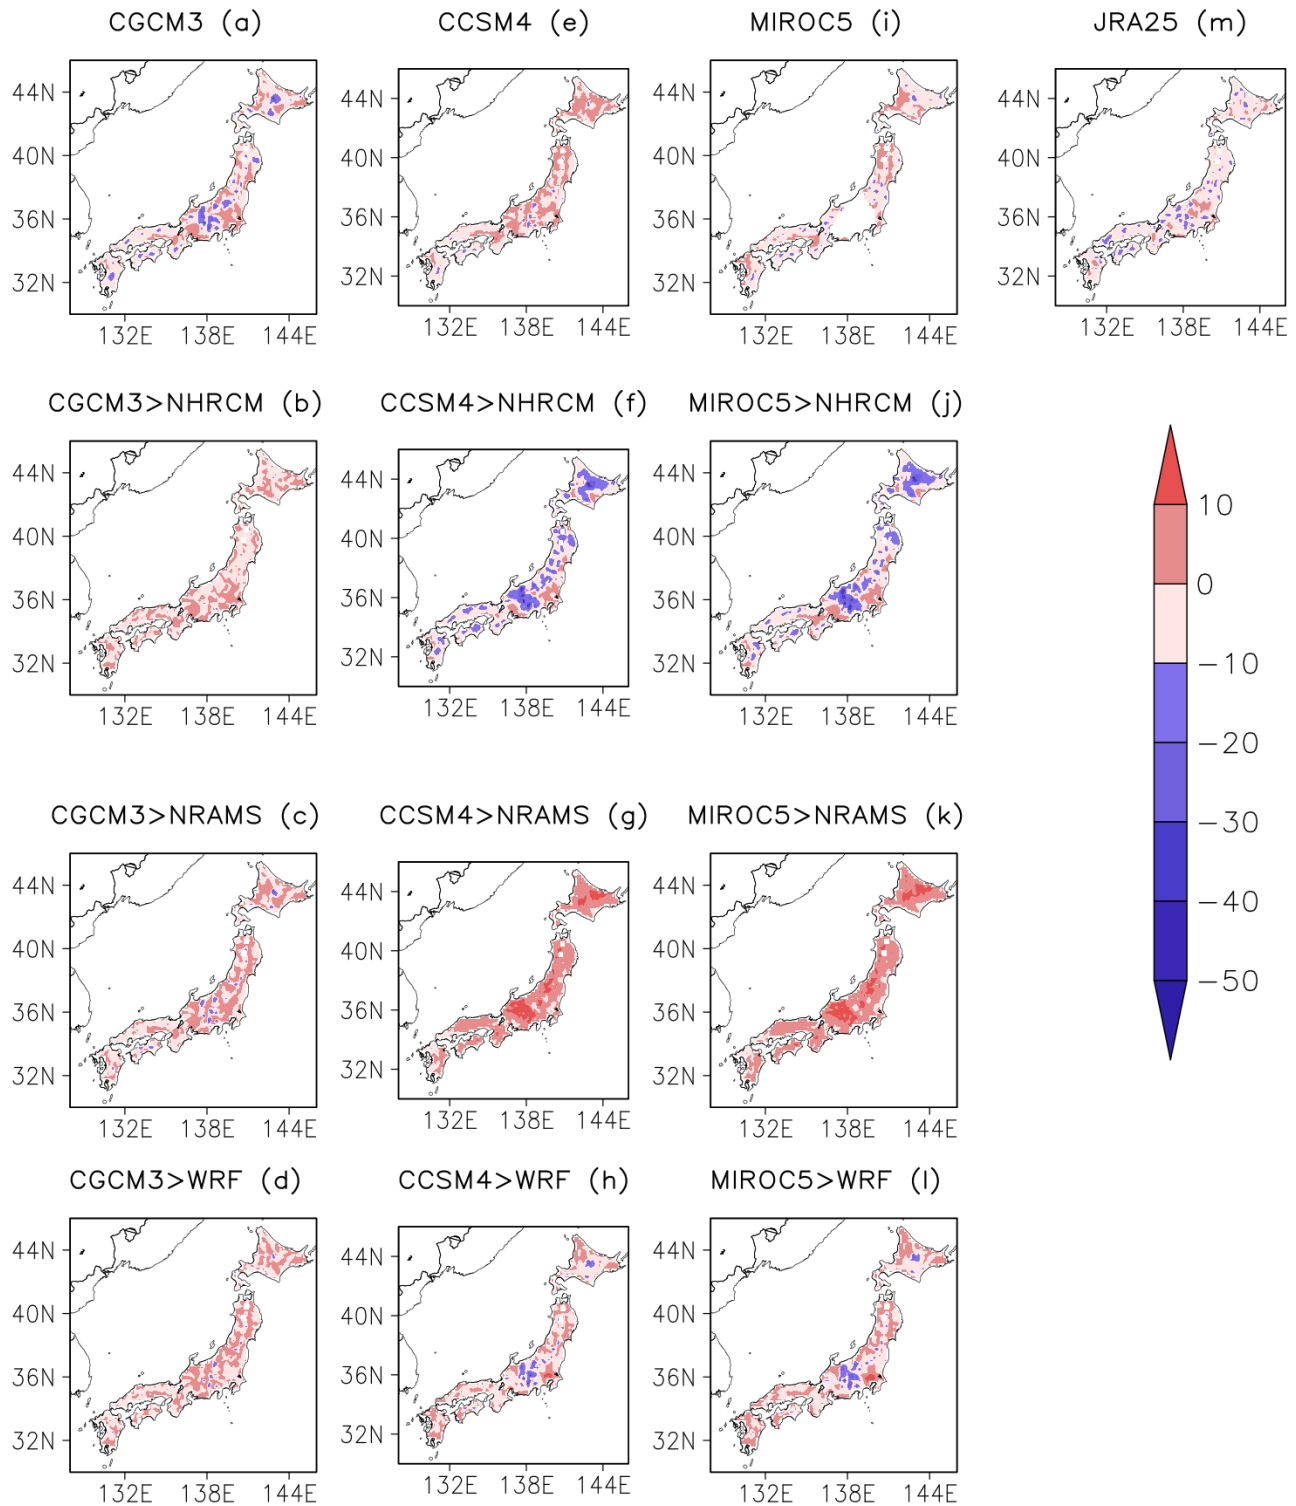

**Figure S6: Absolute difference between bias before and after the adjustment for relative humidity (RH) GCMs, JRA25 (Top row), and corresponding RCMs.**
